# Supplementary material for: Comparative forecasting of adverse drug reaction trends among leprosy patients: Insights from the ARIMA and ETS models in a postpandemic context in a tertiary care center in Sri Lanka
Source: Research Square preprint supplement (doi:10.21203/rs.3.rs-5923451/v1), 2025-02-04
Supplement: Supplementary file 1 [file 89dde5aff2fb08844ee285d9.docx]

| **COVID_era** | **Baseline_Hb** | ***p* *** | **Hb_drop** | ***p* *** | **Timegap_for_Hb_drop (wks)** | ***p* *** | **Baseline_SGPT** | ***p* *** | **SGPT_elevation** | ***p* *** | **Timegap_for_SGPT_elevation (wks)** | ***p* *** |
| --- | --- | --- | --- | --- | --- | --- | --- | --- | --- | --- | --- | --- |
| **Pre-Mean** | 13.5 |  | 2.26 |  | 5.83 |  | 36.2 |  | 13.2 |  | 5.13 |  |
| **Post-Mean** | 13.9 |  | 2.47 |  | 6.49 |  | 33.7 |  | 34.8 |  | 6.24 |  |
| **Pre-Median** | 13.5 | 0.001 | 2.15 | 0.008 | 4.00 | 0.022 | 28.1 | 0.198 | 7.00 | 0.247 | 4.00 | <.001 |
| **Post-Median** | 14.0 | 2.50 | 5.00 | 25.0 | 8.50 | 5.00 |

**Table 2:** Blood indices before and after the pandemic

* Mann‒Whitney U test
